# Supplementary material
Source: Research Square preprint supplement (doi:10.21203/rs.3.rs-9637584/v1)
Supplement: Supplementary file 1 [file 90b24895ea2b7fc92ad41dd3.docx]

**Supplementary Information**

All the verbs in each construction are as follows.

| Ditransitive construction | Resultative construction | Cause-Moting construction | Way construction |
| --- | --- | --- | --- |
| afford | beat | anchor | batter |
| allocate | bend | bring | battle |
| assign | bring | brush | beat |
| award | brush | carry | bluff |
| bake | burn | cast | burst |
| bequeath | chop | cram | chew |
| book | cook | dart | chop |
| bring | crack | direct | claw |
| build | crush | drag | cleave |
| buy | cry | drive | crash |
| cast | cut | drop | crawl |
| cook | drive | dump | creep |
| copy | dye | eject | cut |
| deliver | ease | flick | dig |
| deny | elect | fling | drag |
| design | flip | flip | eat |
| donate | fold | fly | edge |
| draw | grind | force | elbow |
| earn | hang | get | fight |
| fax | hit | guide | flail |
| fetch | hold | hang | force |
| find | keep | haul | forge |
| fix | kick | heave | grind |
| forward | lay | hoist | grope |
| furnish | leave | hurl | guide |
| gain | make | jam | hack |
| get | open | kick | hike |
| give | paint | laugh | inch |
| grant | place | lay | jostle |
| guarantee | polish | lead | kick |
| hand | push | lean | knife |
| install | put | let | limp |
| knit | render | lift | lumber |
| leave | rinse | lower | make |
| lend | rip | lure | march |
| loan | roll | move | muscle |
| mail | run | park | navigate |
| make | send | pitch | nose |
| offer | set | place | plod |
| order | shake | plant | plow |
| owe | shock | pour | press |
| paint | shoot | pull | pry |
| pass | slice | pump | puff |
| pay | smooth | push | pull |
| pour | split | put | punch |
| prepare | spread | raise | push |
| present | stain | rest | ram |
| promise | stick | roll | rumble |
| provide | stretch | run | sail |
| save | strike | send | shoulder |
| secure | strip | set | slide |
| send | sweep | shift | slither |
| set | tear | shove | slog |
| sew | towel | slide | snake |
| ship | tug | spread | squeeze |
| show | turn | squeeze | stagger |
| sing | twist | stuff | struggle |
| spare | wash | swing | stumble |
| supply | wear | take | swim |
| teach | wipe | throw | talk |
| tell | work | thrust | thread |
| text | wrap | toss | trudge |
| throw | wrench | usher | wade |
| toss | wriggle | wedge | weave |
| weave | yank |  | wind |
| win | zip |  | wing |
| wire |  |  | worm |
| yield |  |  | wriggle |
|  |  |  |  |
